# Supplementary material
Source: PubMed Central journal article supplement (PMC556285)

**A**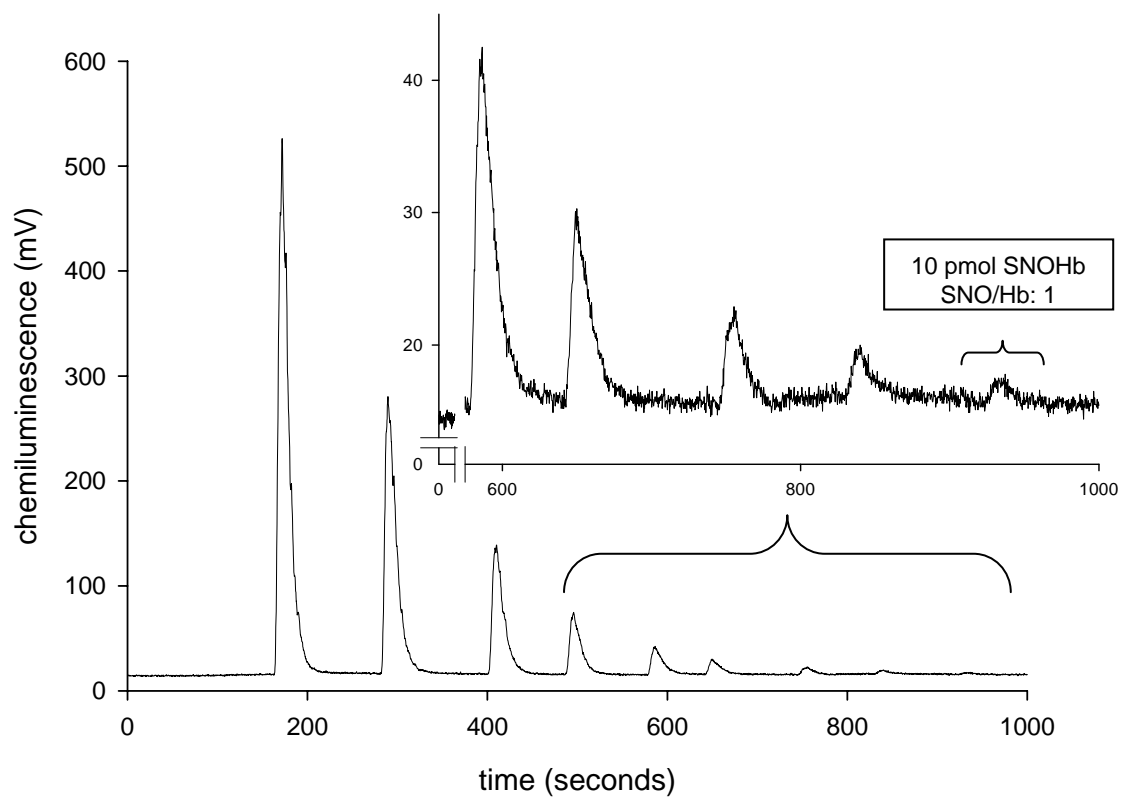**B**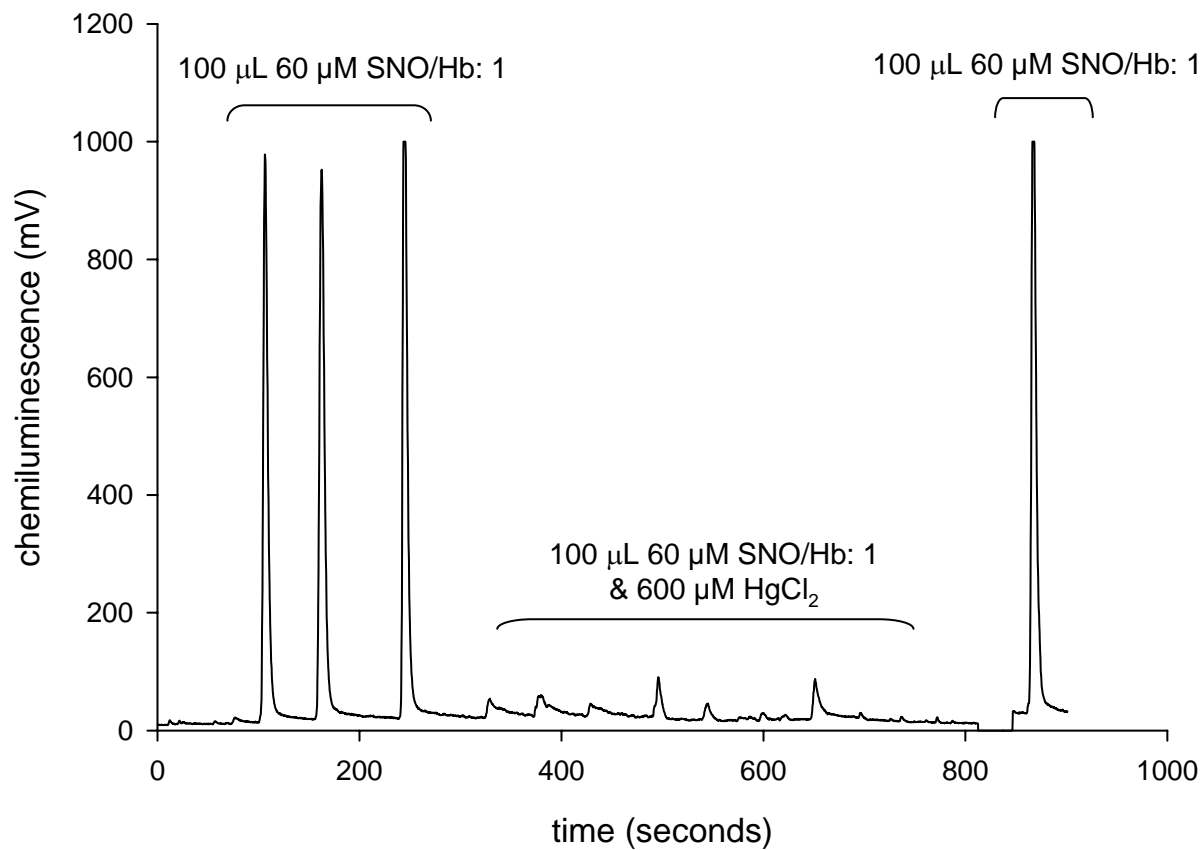

Supplement: pnas_102_16_5709__2.pdf [file pnas_102_16_5709__2.pdf]

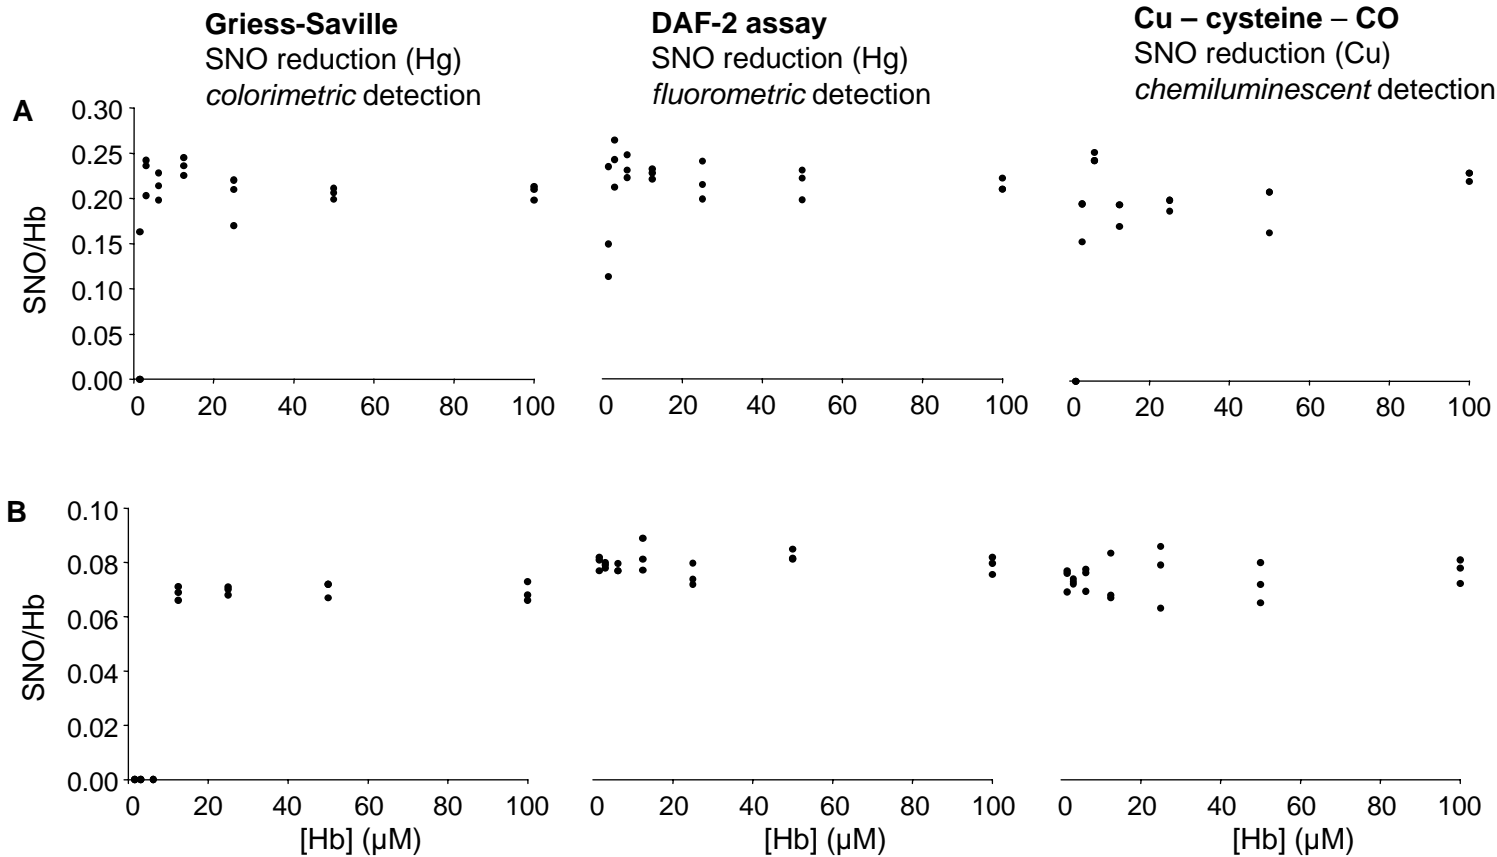

Supplement: pnas_102_16_5709__3.pdf [file pnas_102_16_5709__3.pdf]

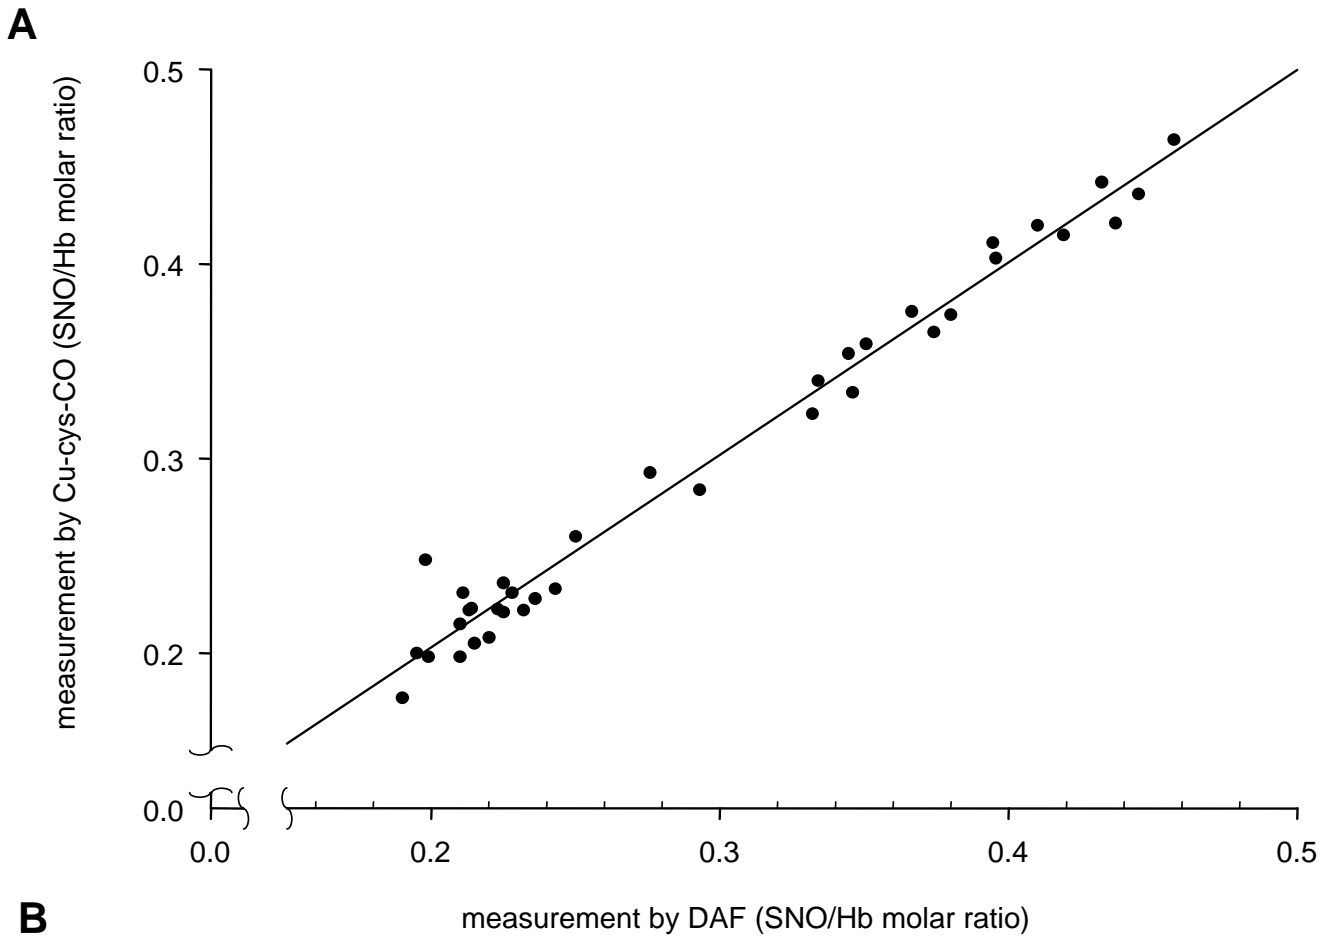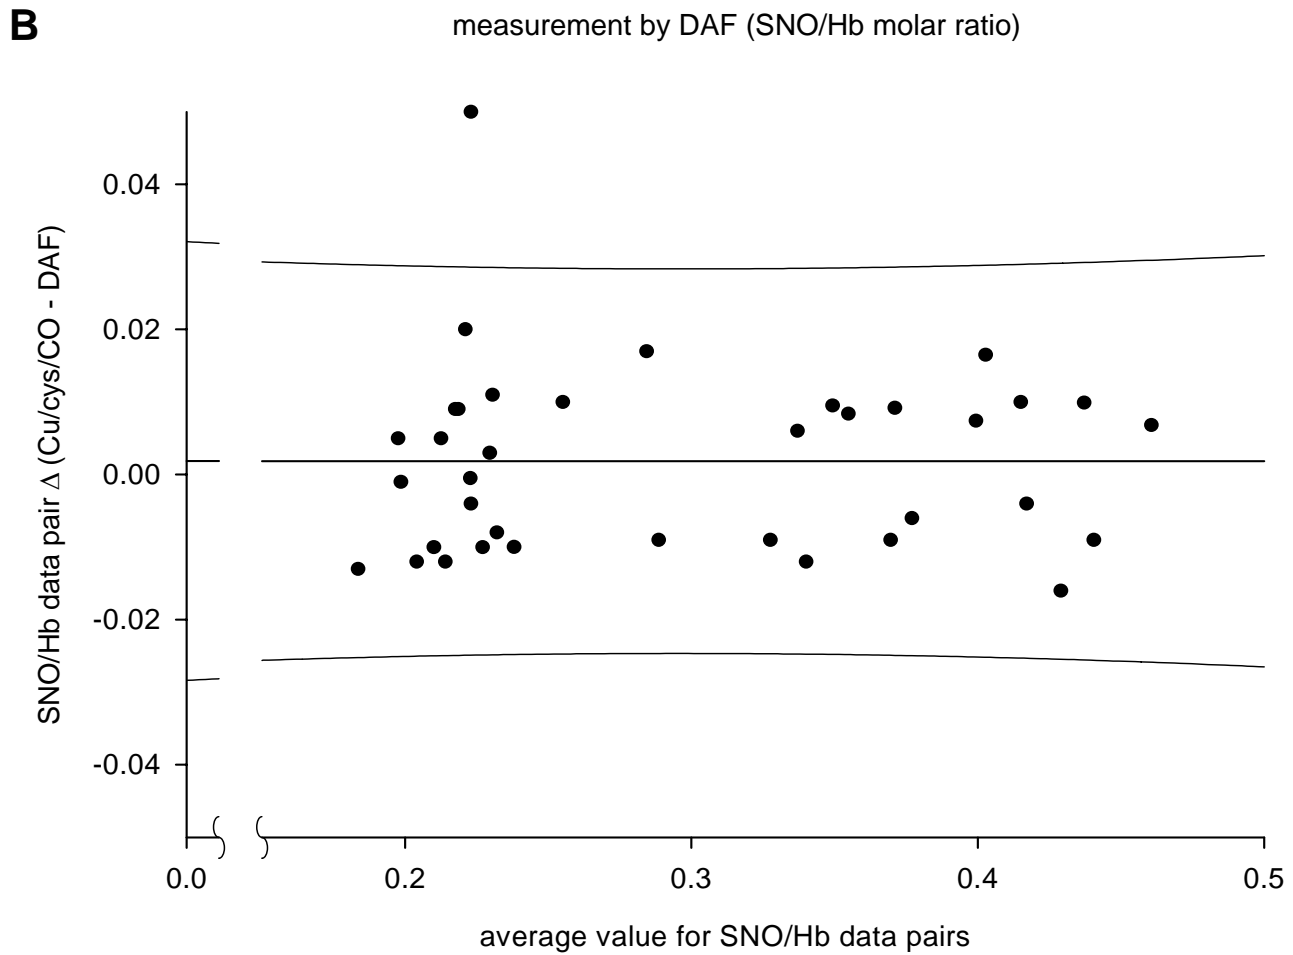

**C**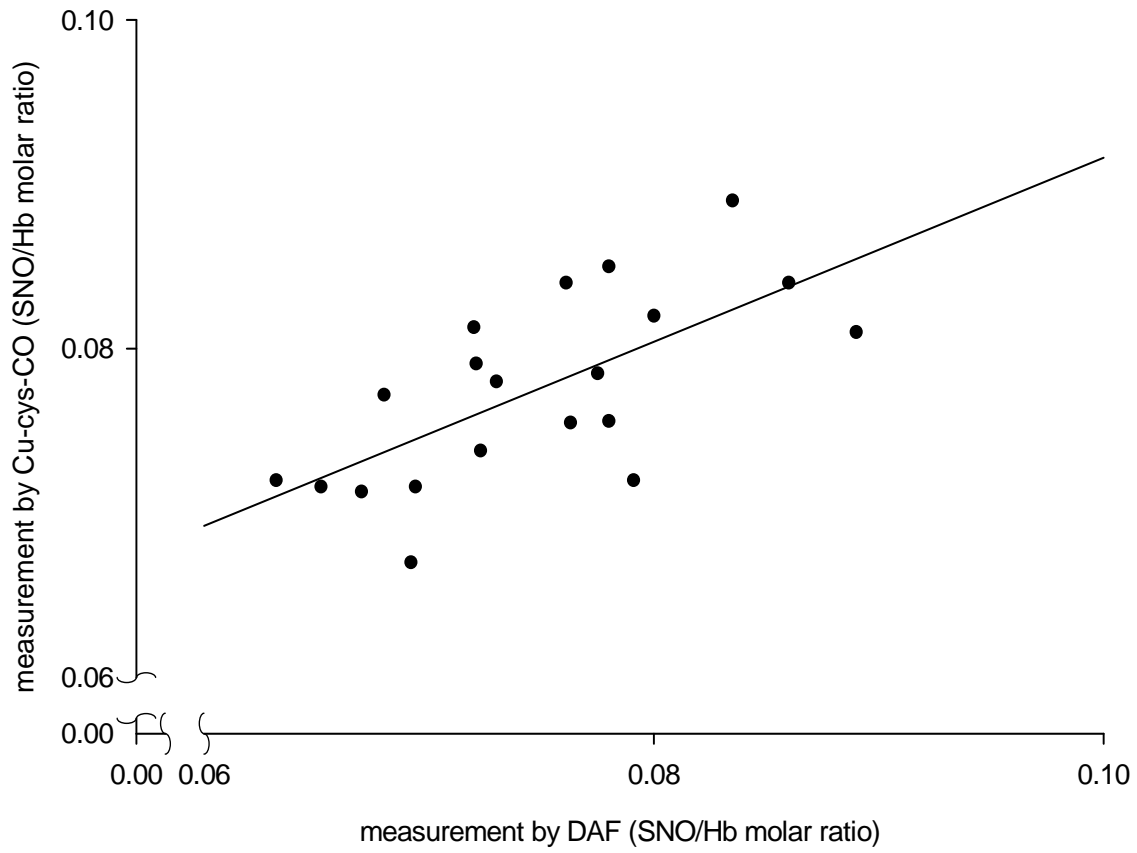**D**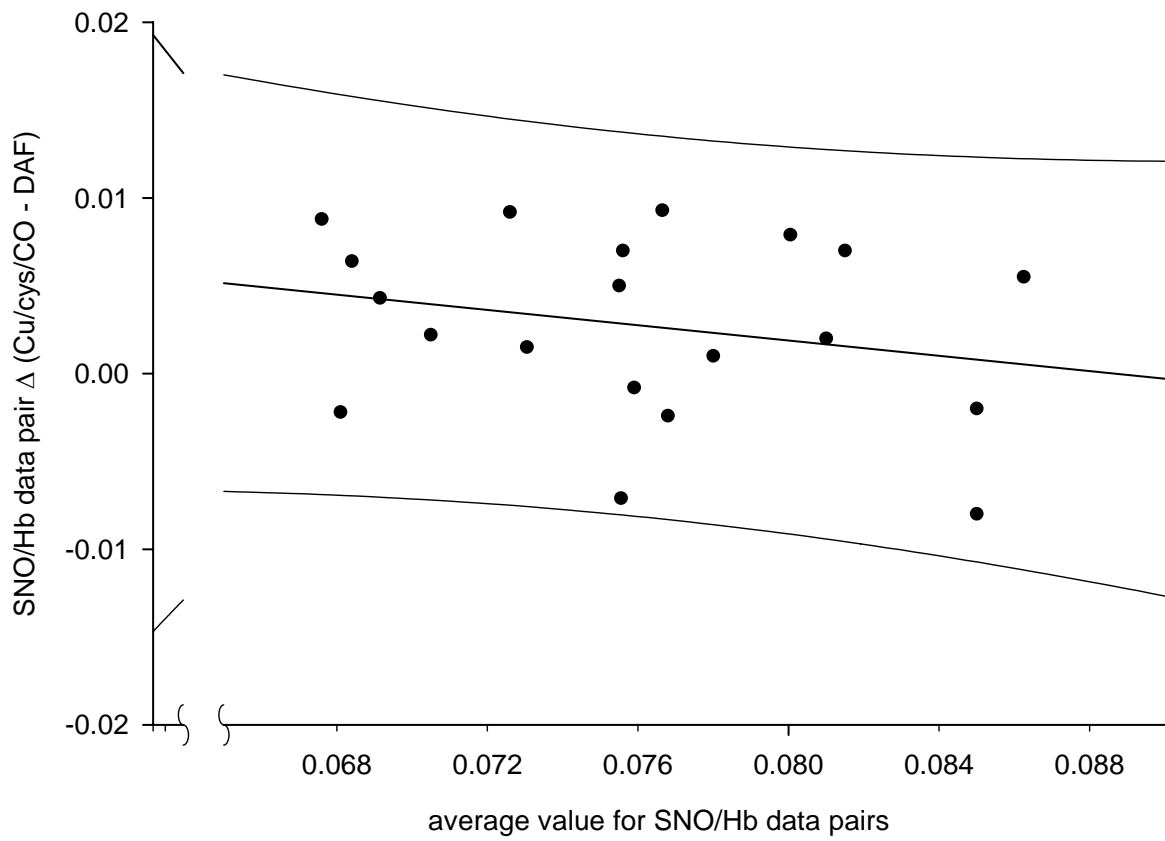

Supplement: pnas_102_16_5709__4.pdf [file pnas_102_16_5709__4.pdf]
